# Supplementary material for: Risk factors for operated carpal tunnel syndrome: a multicenter population-based case-control study
Source: PubMed Central journal article supplement (PMC2761403; doi:10.1186/1471-2458-9-343), 2009-09-16
Supplement: 1471-2458-9-343-S1.pdf [file 1471-2458-9-343-S1.pdf]

**Additional file 1.** Distribution of response modalities among the 780 attempted contacts (260 for cases, 520 for controls), and distributions of level of education and professional category among respondents

|                               | 'Cases'               |                |                 | 'Controls'            |                 |                 |
|-------------------------------|-----------------------|----------------|-----------------|-----------------------|-----------------|-----------------|
|                               | <b>Overall</b>        | No school      | Blue-collar     | <b>Overall</b>        | No school       | Blue-collar     |
|                               | <b>responses</b>      | diploma        | workers         | <b>responses</b>      | diploma         | workers         |
|                               | <b>n/N (%)</b>        | n/N (%)        | n/N (%)         | <b>n/N (%)</b>        | n/N (%)         | n/N (%)         |
| <b>Full questionnaire</b>     | <b>226/260 (86.9)</b> | 175/226 (77.4) | 195/221* (88.2) | <b>386/520 (74.2)</b> | 203/386 (52.6)  | 219/383* (57.2) |
| <i>1<sup>st</sup> mailing</i> | <i>122/260 (46.9)</i> | 86/122 (70.5)  | 100/117* (85.5) | <i>126/520 (24.2)</i> | 49/126 (38.9)   | 59/126 (46.8)   |
| <i>2<sup>nd</sup> mailing</i> | <i>43/260 (16.5)</i>  | 36/43 (83.7)   | 40/43 (93.0)    | <i>85/520 (16.3)</i>  | 47/85 (55.3)    | 47/82* (57.3)   |
| <i>Telephone</i>              | <i>61/260 (23.5)</i>  | 53/61 (86.9)   | 55/61 (90.2)    | <i>175/520 (33.7)</i> | 107/175 (61.1)  | 113/175 (64.6)  |
| <b>Brief questionnaire</b>    | <b>1/260 (0.4)</b>    | 1/1 (100.0)    | 1/1 (100.0)     | <b>27/520 (5.2)</b>   | 20/21* (95.2)   | 18/22* (81.8)   |
| <b>Any form of response</b>   | <b>227/260 (87.3)</b> | 176/227 (77.5) | 196/222* (88.3) | <b>413/520 (79.4)</b> | 223/407* (54.8) | 237/405* (58.5) |

\*These denominators differ from the overall numbers of respondents due to incomplete information in the replies.
