# Supplementary material for: Risk factors for operated carpal tunnel syndrome: a multicenter population-based case-control study
Source: PubMed Central journal article supplement (PMC2761403; doi:10.1186/1471-2458-9-343), 2009-09-16
Supplement: 1471-2458-9-343-S2.pdf [file 1471-2458-9-343-S2.pdf]

**Additional file 2.** Summary statistics of selected individual factors (and hours of housework) according to gender and socio-occupational category

|                                    | Women        |           |           |             |           |            |            |           |           | Men          |           |           |             |           |           |
|------------------------------------|--------------|-----------|-----------|-------------|-----------|------------|------------|-----------|-----------|--------------|-----------|-----------|-------------|-----------|-----------|
|                                    | White Collar |           |           | Blue Collar |           |            | Housewives |           |           | White Collar |           |           | Blue Collar |           |           |
|                                    | Cases        | Controls  | Overall   | Cases       | Controls  | Overall    | Cases      | Controls  | Overall   | Cases        | Controls  | Overall   | Cases       | Controls  | Overall   |
|                                    | N=16         | N=109     | N=125     | N=101       | N=71      | N=172      | N=46       | N=58      | N=104     | N=3          | N=25      | N=28      | N=25        | N=23      | N=48      |
|                                    | mean±sd      | mean±sd   | mean±sd   | mean±sd     | mean±sd   | mean±sd    | mean±sd    | mean±sd   | mean±sd   | mean±sd      | mean±sd   | mean±sd   | mean±sd     | mean±sd   | mean±sd   |
| BMI, kg/m <sup>2</sup>             | 26.2±5.9     | 23.0±3.6  | 23.5±4.1  | 25.9±4.5    | 23.7±3.4  | 25.0±4.2   | 26.8±5.9   | 26.5±5.7  | 26.6±5.7  | 25.7±3.9     | 26.8±3.0  | 26.7±3.1  | 28.4±3.7    | 26.3±2.8  | 27.4±3.4  |
| Height, cm                         | 161.9±5.2    | 163.4±6.3 | 163.2±6.2 | 159.2±6.1   | 162.4±5.5 | 160.5±6.0  | 160.7±5.3  | 160.8±5.6 | 160.7±5.5 | 170.7±2.3    | 175.1±5.7 | 174.6±5.6 | 171.5±6.2   | 173.7±6.7 | 172.5±6.5 |
| Parity, n                          | 1.4±1.1      | 1.1±0.9   | 1.1±1.0   | 1.4±1.1     | 1.5±1.1   | 1.5±1.1    | 2.3±1.4    | 1.8±1.2   | 2.0±1.3   | —            | —         | —         | —           | —         | —         |
| Housework, h/day                   | 3.9±2.7      | 3.7±2.7   | 3.8±2.7   | 5.5±4.4     | 4.4±2.9   | 5.0±3.9    | 8.9±4.3    | 7.8±3.5   | 8.3±3.9   | 0.7±0.6      | 0.9±1.4   | 0.9±1.3   | 0.7±1.1     | 0.3±0.8   | 0.5±1.0   |
|                                    | n (%)        | n (%)     | n (%)     | n (%)       | n (%)     | n (%)      | n (%)      | n (%)     | n (%)     | n (%)        | n (%)     | n (%)     | n (%)       | n (%)     | n (%)     |
| High educational status*           | 8 (50.0)     | 87 (79.8) | 95 (76.0) | 15 (14.9)   | 21 (29.6) | 36 (20.9)  | 7 (15.2)   | 15 (25.9) | 22 (21.2) | 3 (100.0)    | 20 (80.0) | 23 (82.1) | 6 (24.0)    | 5 (21.7)  | 11 (22.9) |
| Drinkers                           | 10 (62.5)    | 74 (67.9) | 84 (67.2) | 63 (62.4)   | 49 (69.0) | 112 (65.1) | 25 (54.4)  | 35 (60.3) | 60 (57.7) | 3 (100.0)    | 24 (96.0) | 27 (96.4) | 23 (92.0)   | 21 (91.3) | 44 (91.7) |
| Current smokers                    | 1 (6.3)      | 27 (24.8) | 28 (22.4) | 40 (39.6)   | 21 (29.6) | 61 (35.5)  | 6 (13.0)   | 13 (22.4) | 19 (18.3) | 1 (33.3)     | 7 (29.2)  | 8 (29.6)  | 9 (36.0)    | 5 (21.7)  | 14 (29.2) |
| <i>Family history of CTS</i>       |              |           |           |             |           |            |            |           |           |              |           |           |             |           |           |
| Father/mother                      | 0 (0.0)      | 12 (11.0) | 12 (9.6)  | 11 (11.1)   | 5 (7.0)   | 16 (9.4)   | 2 (4.4)    | 0 (0.0)   | 2 (1.9)   | 0 (0.0)      | 3 (12.0)  | 3 (10.7)  | 2 (8.0)     | 2 (8.7)   | 4 (8.3)   |
| Sibling                            | 0 (0.0)      | 2 (1.8)   | 2 (1.6)   | 7 (7.0)     | 0 (0.0)   | 7 (4.1)    | 6 (13.0)   | 1 (1.8)   | 7 (6.8)   | —            | —         | —         | 2 (8.0)     | 0 (0.0)   | 2 (4.2)   |
| <i>Most frequent comorbidities</i> |              |           |           |             |           |            |            |           |           |              |           |           |             |           |           |
| Rheumatoid arthritis               | 0 (0.0)      | 7 (6.4)   | 7 (5.6)   | 15 (15.0)   | 4 (5.6)   | 19 (11.1)  | 10 (21.7)  | 3 (5.2)   | 13 (12.5) | 1 (33.3)     | 0 (0.0)   | 1 (3.6)   | 4 (16.0)    | 5 (21.7)  | 9 (18.8)  |
| Trigger finger                     | 0 (0.0)      | 1 (0.9)   | 1 (0.8)   | 22 (22.0)   | 7 (9.9)   | 29 (17.0)  | 8 (17.4)   | 5 (8.6)   | 13 (12.5) | 1 (33.3)     | 2 (8.0)   | 3 (10.7)  | 2 (8.0)     | 0 (0.0)   | 2 (4.2)   |
| Thyroid disorders                  | 0 (0.0)      | 15 (13.8) | 15 (12.0) | 15 (15.0)   | 7 (9.9)   | 22 (12.9)  | 10 (21.7)  | 10 (17.2) | 20 (19.2) | 0 (0.0)      | 1 (4.0)   | 1 (3.6)   | 2 (8.0)     | 0 (0.0)   | 2 (4.2)   |
| At least 1 wrist fracture          | 0 (0.0)      | 7 (6.4)   | 7 (5.6)   | 4 (4.0)     | 6 (8.5)   | 10 (5.8)   | 2 (4.4)    | 4 (6.9)   | 6 (5.8)   | 1 (33.3)     | 6 (24.0)  | 7 (25.0)  | 4 (16.0)    | 1 (4.4)   | 5 (10.4)  |

\*High school diploma or higher.
