# Supplementary material for: Risk factors for operated carpal tunnel syndrome: a multicenter population-based case-control study
Source: PubMed Central journal article supplement (PMC2761403; doi:10.1186/1471-2458-9-343), 2009-09-16
Supplement: 1471-2458-9-343-S3.pdf [file 1471-2458-9-343-S3.pdf]

**Additional file 3.** Risks of surgically treated CTS associated with job titles prevalent in the last 10 years and lifetime among non-retired women

|                                         | Last 10 years |          |                  |                  | Lifetime  |          |                  |                  |
|-----------------------------------------|---------------|----------|------------------|------------------|-----------|----------|------------------|------------------|
|                                         | Cases         | Controls | Univariate       | Multivariate*    | Cases     | Controls | Univariate       | Multivariate*    |
|                                         |               |          | OR (95% CI)      | OR (95% CI)      |           |          | OR (95% CI)      | OR (95% CI)      |
| (n = 169)                               | (n = 249)     |          |                  | (n = 184)        | (n = 285) |          |                  |                  |
| White collar                            | 20            | 108†     | 1.0              | 1.0              | 22        | 120      | 1.0              | 1.0              |
| Food retail workers                     | 8             | 2        | 21.6 (3.6–129.2) | 21.9 (4.1–116.9) | 9         | 2        | 24.5 (4.2–144.5) | 24.1 (4.7–123.3) |
| Miscellaneous blue-collar workers       | 13            | 6‡       | 11.7 (3.5–38.7)  | 11.4 (3.4–38.0)  | 14        | 6        | 12.7 (3.9–41.3)  | 12.1 (4.0–37.0)  |
| Waiters/bartenders                      | 6             | 4        | 8.1 (2.0–33.5)   | 7.6 (1.8–31.2)   | 4         | 7        | 3.1 (0.8–11.8)   | 3.5 (0.9–13.8)   |
| Cooks                                   | 6             | 4        | 8.1 (2.0–33.5)   | 8.7 (2.0–37.8)   | 4         | 5        | 4.4 (1.1–18.0)   | 3.8 (0.9–16.3)   |
| Agricultural/horticultural workers      | 10            | 6        | 9.0 (2.7–30.0)   | 7.0 (2.1–23.0)   | 13        | 6        | 11.8 (3.6–38.4)  | 9.2 (3.0–28.4)   |
| Cleaners and domestic helpers           | 12            | 13       | 5.0 (1.9–13.1)   | 4.1 (1.5–11.1)   | 9         | 9        | 5.5 (1.9–16.0)   | 4.1 (1.4–12.1)   |
| Textile (mainly sewing-machine) workers | 4             | 3        | 7.2 (1.4–36.6)   | 9.9 (1.8–55.2)   | 7         | 11       | 3.5 (1.2–10.2)   | 3.3 (1.1–10.0)   |
| Metal workers                           | 5             | 3        | 9.0 (1.9–43.7)   | 9.8 (2.0–47.5)   | 3         | 8        | 2.0 (0.5–8.4)    | 2.0 (0.5–8.8)    |
| Packaging workers                       | 6             | 5        | 6.5 (1.7–24.6)   | 5.7 (1.5–21.6)   | 5         | 7        | 3.9 (1.1–13.7)   | 4.9 (1.3–18.7)   |
| Nurses and paramedical workers          | 6             | 11       | 2.9 (1.0–9.0)    | 2.3 (0.8–7.2)    | 8         | 16       | 2.7 (1.0–7.3)    | 2.7 (1.0–7.3)    |
| Miscellaneous service sector workers    | 15            | 17       | 4.8 (2.0–11.6)   | 4.7 (1.9–11.5)   | 26        | 18       | 7.9 (3.4–18.1)   | 7.0 (3.2–15.2)   |
| Housewives                              | 50            | 56       | 4.8 (2.5–9.3)    | 3.9 (1.9–7.7)    | 50        | 51       | 5.3 (2.8–10.2)   | 4.7 (2.4–9.3)    |
| Tailors                                 | 6             | 5        | 6.5 (1.7–24.6)   | 6.2 (1.6–23.9)   | 9         | 9        | 5.5 (1.9–16.0)   | 6.2 (2.1–18.7)   |
| Pre-primary school workers              | 2             | 6        | 1.8 (0.3–9.6)    | 1.9 (0.3–10.9)   | 1         | 10       | 0.5 (0.1–4.5)    | 0.7 (0.1–5.5)    |

NOTE: Discrepancies in the numbers of cases and controls in these two analyses depend on the different definitions of prevalent job titles (more subjects satisfy a definition based on lifetime prevalence than one based on “prevalent in the last 10 years” or (as in the main analysis) “prevalent in the last 2 years”).

\*Unconditional logistic regression models adjusted for the individual factors entered in the multivariate model reported in Table 2 (ie. BMI, height, parity, age and center).

†Includes 2 students.

‡Includes 1 unemployed blue collar worker.
