# Supplementary material for: Risk factors for operated carpal tunnel syndrome: a multicenter population-based case-control study
Source: PubMed Central journal article supplement (PMC2761403; doi:10.1186/1471-2458-9-343), 2009-09-16
Supplement: 1471-2458-9-343-S4.pdf [file 1471-2458-9-343-S4.pdf]

**Additional file 4.** Numbers (percentages) of workers exposed to different biomechanical risk factors by socio-occupational status and blue-collar job titles

|                                                 | <b>White collar</b><br>(N=153) | <b>Housewives</b><br>(N=104) | <b>Blue-collar</b><br>(N=220) | <i>Food retail workers</i><br>(N=10) | <i>Agricultural/horticultural workers</i><br>(N=18) | <i>Waiters/bartenders</i><br>(N=9) | <i>Miscellaneous blue-collar workers</i><br>(N=36) | <i>Cooks</i><br>(N=11) | <i>Nurses and paramedical workers</i><br>(N=17) | <i>Cleaners and domestic helpers</i><br>(N=21) | <i>Textile (mainly sewing-machine) workers</i><br>(N=9) | <i>Miscellaneous service sector workers</i><br>(N=26) | <i>Packaging workers</i><br>(N=13) | <i>Drivers</i><br>(N=8) | <i>Metal workers</i><br>(N=23) | <i>Tailors</i><br>(N=10) | <i>Pre-primary school workers</i><br>(N=9) |
|-------------------------------------------------|--------------------------------|------------------------------|-------------------------------|--------------------------------------|-----------------------------------------------------|------------------------------------|----------------------------------------------------|------------------------|-------------------------------------------------|------------------------------------------------|---------------------------------------------------------|-------------------------------------------------------|------------------------------------|-------------------------|--------------------------------|--------------------------|--------------------------------------------|
| <b>Not exposed</b>                              | <b>138</b>                     | <b>55</b>                    | <b>104</b>                    | <i>1</i>                             | <i>6</i>                                            | <i>1</i>                           | <i>17</i>                                          | <i>0</i>               | <i>16</i>                                       | <i>16</i>                                      | <i>1</i>                                                | <i>18</i>                                             | <i>4</i>                           | <i>8</i>                | <i>2</i>                       | <i>5</i>                 | <i>9</i>                                   |
|                                                 | <b>(90%)</b>                   | <b>(53%)</b>                 | <b>(47%)</b>                  | <i>(10%)</i>                         | <i>(33%)</i>                                        | <i>(11%)</i>                       | <i>(47%)</i>                                       | <i>(0%)</i>            | <i>(94%)</i>                                    | <i>(76%)</i>                                   | <i>(11%)</i>                                            | <i>(69%)</i>                                          | <i>(31%)</i>                       | <i>(100%)</i>           | <i>(9%)</i>                    | <i>(50%)</i>             | <i>(100%)</i>                              |
| <b>Vibratory tools</b>                          | <b>1</b>                       | <b>0</b>                     | <b>24</b>                     | <i>0</i>                             | <i>2</i>                                            | <i>0</i>                           | <i>7</i>                                           | <i>0</i>               | <i>1</i>                                        | <i>0</i>                                       | <i>1</i>                                                | <i>0</i>                                              | <i>0</i>                           | <i>0</i>                | <i>13</i>                      | <i>0</i>                 | <i>0</i>                                   |
|                                                 | <b>(0.7%)</b>                  | <b>(0%)</b>                  | <b>(11%)</b>                  | <i>(0%)</i>                          | <i>(11%)</i>                                        | <i>(0%)</i>                        | <i>(19%)</i>                                       | <i>(0%)</i>            | <i>(6%)</i>                                     | <i>(0%)</i>                                    | <i>(11%)</i>                                            | <i>(0%)</i>                                           | <i>(0%)</i>                        | <i>(0%)</i>             | <i>(57%)</i>                   | <i>(0%)</i>              | <i>(0%)</i>                                |
| <b>Forceful hand/wrist movements</b>            | <b>1</b>                       | <b>47</b>                    | <b>69</b>                     | <i>6</i>                             | <i>10</i>                                           | <i>3</i>                           | <i>14</i>                                          | <i>11</i>              | <i>1</i>                                        | <i>3</i>                                       | <i>2</i>                                                | <i>2</i>                                              | <i>1</i>                           | <i>0</i>                | <i>14</i>                      | <i>2</i>                 | <i>0</i>                                   |
|                                                 | <b>(0.7%)</b>                  | <b>(45%)</b>                 | <b>(31%)</b>                  | <i>(60%)</i>                         | <i>(56%)</i>                                        | <i>(33%)</i>                       | <i>(39%)</i>                                       | <i>(100%)</i>          | <i>(6%)</i>                                     | <i>(14%)</i>                                   | <i>(22%)</i>                                            | <i>(8%)</i>                                           | <i>(8%)</i>                        | <i>(0%)</i>             | <i>(61%)</i>                   | <i>(20%)</i>             | <i>(0%)</i>                                |
| <b>Frequent repetitive hand/wrist movements</b> | <b>10</b>                      | <b>0</b>                     | <b>65</b>                     | <i>8</i>                             | <i>4</i>                                            | <i>5</i>                           | <i>6</i>                                           | <i>11</i>              | <i>1</i>                                        | <i>2</i>                                       | <i>7</i>                                                | <i>3</i>                                              | <i>7</i>                           | <i>0</i>                | <i>8</i>                       | <i>3</i>                 | <i>0</i>                                   |
|                                                 | <b>(7%)</b>                    | <b>(0%)</b>                  | <b>(30%)</b>                  | <i>(80%)</i>                         | <i>(22%)</i>                                        | <i>(56%)</i>                       | <i>(17%)</i>                                       | <i>(100%)</i>          | <i>(6%)</i>                                     | <i>(10%)</i>                                   | <i>(78%)</i>                                            | <i>(12%)</i>                                          | <i>(54%)</i>                       | <i>(0%)</i>             | <i>(35%)</i>                   | <i>(30%)</i>             | <i>(0%)</i>                                |
| <b>Uncomfortable hand postures</b>              | <b>4</b>                       | <b>3</b>                     | <b>63</b>                     | <i>4</i>                             | <i>1</i>                                            | <i>8</i>                           | <i>10</i>                                          | <i>11</i>              | <i>1</i>                                        | <i>2</i>                                       | <i>5</i>                                                | <i>4</i>                                              | <i>4</i>                           | <i>0</i>                | <i>9</i>                       | <i>4</i>                 | <i>0</i>                                   |
|                                                 | <b>(3%)</b>                    | <b>(3%)</b>                  | <b>(29%)</b>                  | <i>(40%)</i>                         | <i>(6%)</i>                                         | <i>(89%)</i>                       | <i>(28%)</i>                                       | <i>(100%)</i>          | <i>(6%)</i>                                     | <i>(10%)</i>                                   | <i>(56%)</i>                                            | <i>(15%)</i>                                          | <i>(31%)</i>                       | <i>(0%)</i>             | <i>(39%)</i>                   | <i>(40%)</i>             | <i>(0%)</i>                                |
| <b>Frequent pinching</b>                        | <b>1</b>                       | <b>1</b>                     | <b>43</b>                     | <i>2</i>                             | <i>3</i>                                            | <i>0</i>                           | <i>6</i>                                           | <i>1</i>               | <i>1</i>                                        | <i>1</i>                                       | <i>6</i>                                                | <i>4</i>                                              | <i>6</i>                           | <i>0</i>                | <i>10</i>                      | <i>3</i>                 | <i>0</i>                                   |
|                                                 | <b>(0.7%)</b>                  | <b>(1%)</b>                  | <b>(20%)</b>                  | <i>(20%)</i>                         | <i>(17%)</i>                                        | <i>(0%)</i>                        | <i>(17%)</i>                                       | <i>(9%)</i>            | <i>(6%)</i>                                     | <i>(5%)</i>                                    | <i>(67%)</i>                                            | <i>(15%)</i>                                          | <i>(46%)</i>                       | <i>(0%)</i>             | <i>(43%)</i>                   | <i>(30%)</i>             | <i>(0%)</i>                                |
| <b>Skin compression</b>                         | <b>0</b>                       | <b>1</b>                     | <b>42</b>                     | <i>4</i>                             | <i>6</i>                                            | <i>3</i>                           | <i>7</i>                                           | <i>7</i>               | <i>1</i>                                        | <i>2</i>                                       | <i>1</i>                                                | <i>2</i>                                              | <i>2</i>                           | <i>0</i>                | <i>6</i>                       | <i>1</i>                 | <i>0</i>                                   |
|                                                 | <b>(0%)</b>                    | <b>(1%)</b>                  | <b>(19%)</b>                  | <i>(40%)</i>                         | <i>(33%)</i>                                        | <i>(33%)</i>                       | <i>(19%)</i>                                       | <i>(64%)</i>           | <i>(6%)</i>                                     | <i>(10%)</i>                                   | <i>(11%)</i>                                            | <i>(8%)</i>                                           | <i>(15%)</i>                       | <i>(0%)</i>             | <i>(26%)</i>                   | <i>(10%)</i>             | <i>(0%)</i>                                |

Note: Individual workers can have more than 1 exposure.
